# Supplementary material for: Individualized functional connectivity markers associated with motor and mood symptoms of Parkinson’s disease
Source: PubMed Central journal article supplement — bioRxiv. 2024 Feb 2:2024.01.31.578238. Preprint. [Version 1] doi: 10.1101/2024.01.31.578238 (PMC10862849; doi:10.1101/2024.01.31.578238), 2024-02-02
Supplement: media-1.pdf [file media-1.pdf]

## Supplementary Materials

# Individualized functional connectivity markers associated with motor and mood symptoms of Parkinson's disease

Louisa Dahmani, Ph.D.<sup>1,2\*</sup>, Yan Bai, M.D.<sup>1\*</sup>, Wei Zhang, M.Sc.<sup>3\*</sup>, Jianxun Ren, Ph.D.<sup>3</sup>, Shiyi Li, M.Sc.<sup>3</sup>, Qingyu Hu, B.Sc.<sup>3</sup>, Xiaoxuan Fu, Ph.D.<sup>3</sup>, Jianjun Ma, M.D.<sup>4</sup>, Wei Wei, M.D.<sup>1</sup>, Meiyun Wang, M.D, Ph.D.<sup>1#</sup>, Hesheng Liu, Ph.D.<sup>3,5#</sup>, Danhong Wang, M.D., Ph.D.<sup>2#</sup>

<sup>1</sup> Department of Medical Imaging, Henan Provincial People's Hospital, Zhengzhou, Henan, China

<sup>2</sup> Athinoula A. Martinos Center for Biomedical Imaging, Department of Radiology, Massachusetts General Hospital, Harvard Medical School, Charlestown, MA, USA, 02129

<sup>3</sup> Changping Laboratory, Beijing, China

<sup>4</sup> Department of Neurology, Henan Provincial People's Hospital, Zhengzhou, Henan, China

<sup>5</sup> Biomedical Pioneering Innovation Center, Peking University, Beijing, China

\* These authors contributed equally to this work

# Correspondence to:

Dr. Danhong Wang, Dr. Hesheng Liu and Dr. Meiyun Wang

Danhong Wang

Massachusetts General Hospital,

Harvard Medical School, Charlestown, MA, USA, 02129

wangdanh@nmr.mgh.harvard.edu

Hesheng Liu

Changping Laboratory

Yard 28, Science Park Road, Changping District, Beijing

China, 102206.

Email: liuhesheng@cpl.ac.cn

Meiyun Wang

Department of Medical Imaging

Henan Provincial People's Hospital, Zhengzhou

Henan, China

Email: mywang@ha.edu.cn

## Supplementary Results

### Reliable connectivity markers of PD

Since certain regions, particularly those in association cortex, exhibit greater variability in FC, it is reasonable that areas whose FC is less variable, such as those in the sensorimotor network, would demonstrate more consistency when measuring group differences. To control for this, we repeated the consistency analysis using FC strength variability, measured as the standard deviation in FC strength in the control group, as a regressor. FC strength variability did not affect the consistency of the abnormal features (Pearson  $r=0.99$ ,  $p<0.001$ ), and resulted in the selection of the same 44 final features (Dice=1.0; Fig. S1). We also performed control analyses to account for the significant difference in age, sex, and education between the PD and control groups. We repeated the marker identification process using subsets of PD patients whose demographics matched the controls' on each of these factors (Table S3). Again, the consistency of the abnormal features and selection of the final features remained largely the same (sex:  $r=0.98$ ,  $p<0.001$ ; Dice=0.92; age:  $r=0.98$ ,  $p<0.001$ , Dice=0.92; education:  $r=0.99$ ,  $p<0.001$ , Dice=0.96; Fig. S2). Finally, since the PD group exhibited lower head motion than the control group, we repeated the marker identification process with average head motion as a regressor. The consistencies in the initial and motion-regressed analyses were highly correlated and the final feature selection remained largely the same ( $r=0.99$ , Dice=0.97).

### FC strength variability in HC

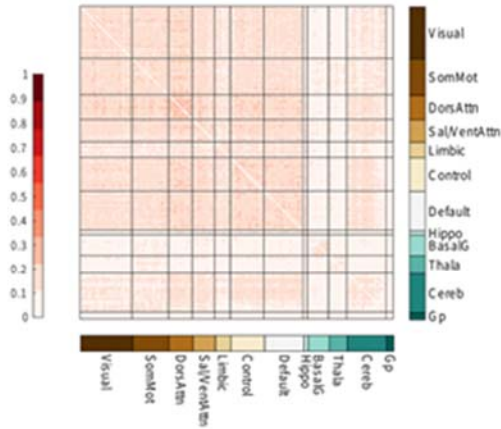

### Regressed abnormal features

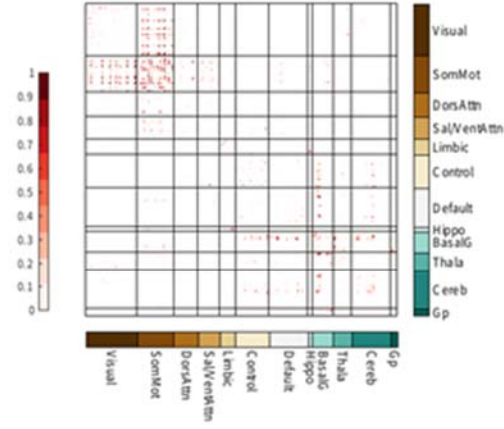

### Cortex

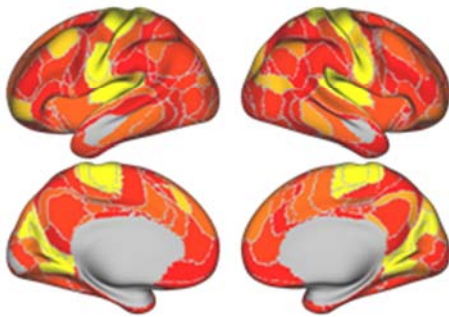

### Subcortex

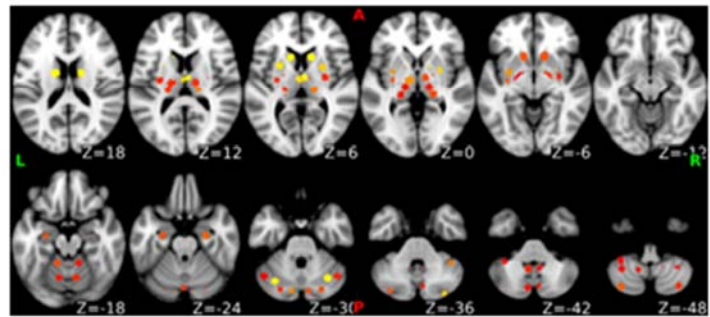

0 0.3  
Consistency

**Supplementary Figure 1 FC strength variability control analysis.** To control for inter-individual differences in FC strength, we repeated the biomarker identification process using FC strength variability as a regressor. FC strength variability did not affect the consistency of the abnormal features, as the clusters' consistency between the initial and control analyses were highly correlated (Pearson  $r=0.99$ ,  $p<0.001$ ). The control analysis yielded the same 44 final features as in the initial analysis (Dice=1.0). The average abnormal feature consistency is shown for each cluster in the cortex and subcortex.

FC=functional connectivity; HC=Healthy control.

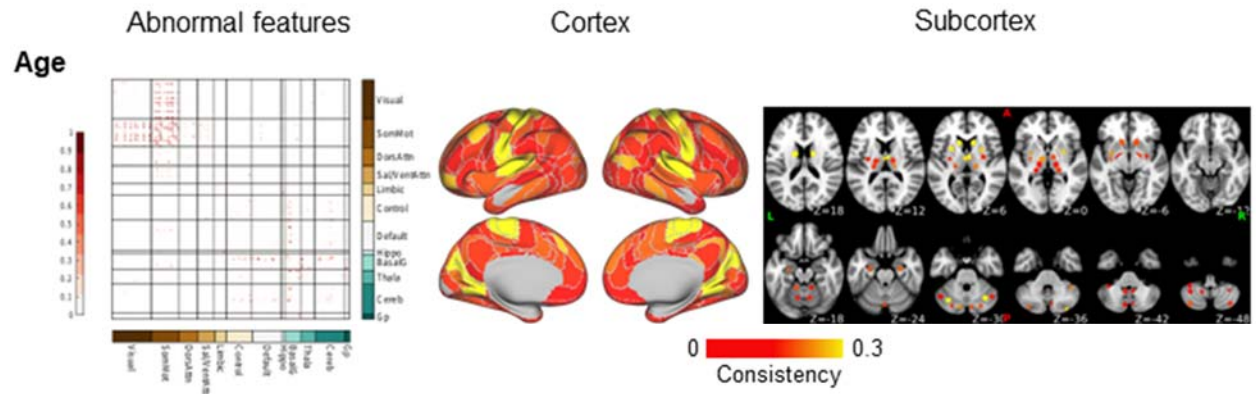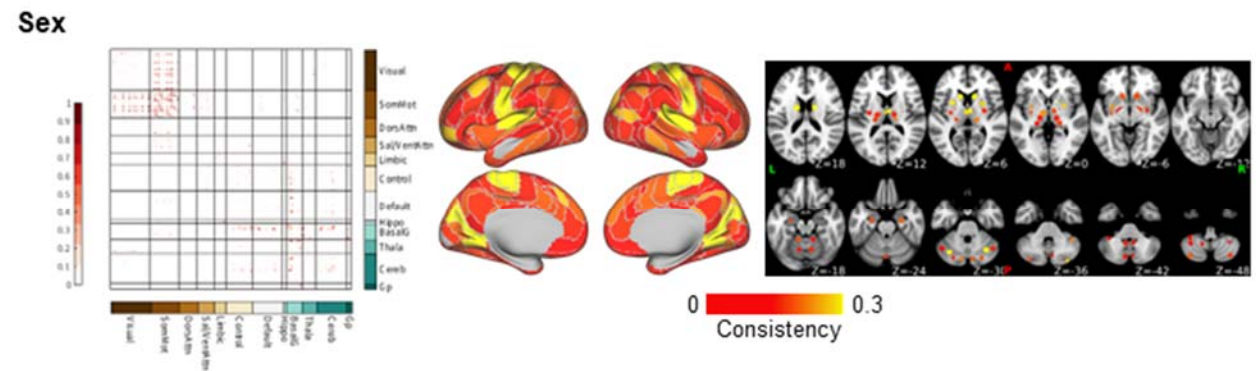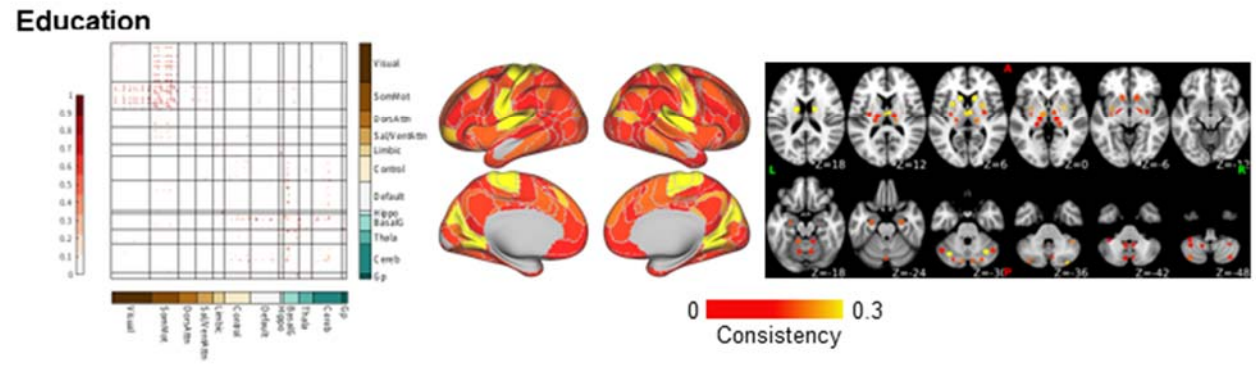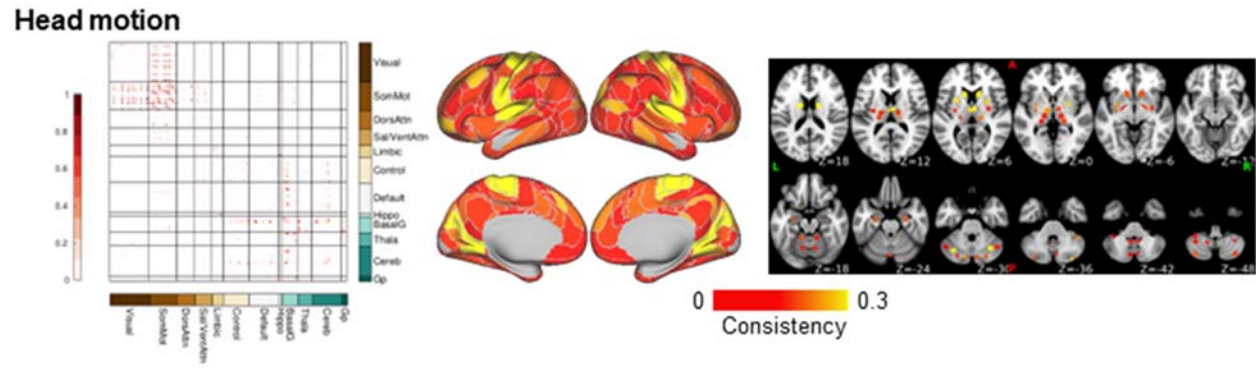

**Supplementary Figure 2 Control analysis using demographics and head motion.** We repeated the biomarker identification process within PD subsets that matched the control group in age (1<sup>st</sup> row), sex (2<sup>nd</sup> row), education (3<sup>rd</sup> row), and head motion (4<sup>th</sup> row). Abnormal feature matrices are shown (left), and the average consistency is shown for each cluster in the cortex (center) and subcortex (right). The consistencies in the initial and demographic- or head motion-matched analyses were highly correlated, and the final feature selection remained largely the same (age: Pearson  $r=0.98$ ,  $p<0.001$ , Dice=0.92; sex: Pearson  $r=0.98$ ,  $p<0.001$ , Dice=0.92; education: Pearson  $r=0.99$ ,  $p<0.001$ , Dice=0.96; head motion: Pearson  $r=0.99$ , Dice=0.97).

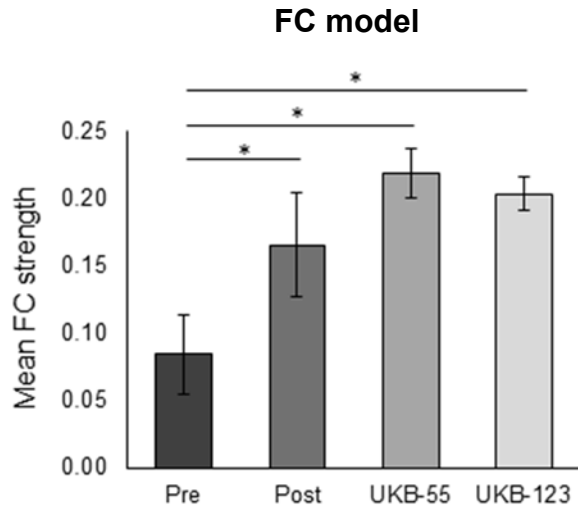

**Supplementary Figure 3 Mean FC strength in the MRgFUS and UKB samples.** At baseline, MRgFUS patients exhibited significantly lower mean FC strength across the 44 FC markers compared to UKB controls (pre vs. UKB-55:  $t=-2.96$ ,  $p=0.004$ ; pre vs. UKB-123:  $t=-2.59$ ,  $p=0.01$ ). After the MRgFUS intervention, the patients' FC strength did not significantly differ from the UKB controls' (post vs. UKB-55:  $t=-1.14$ ,  $p=0.26$ ; post vs. UKB-123:  $t=-0.81$ ,  $p=0.42$ ).

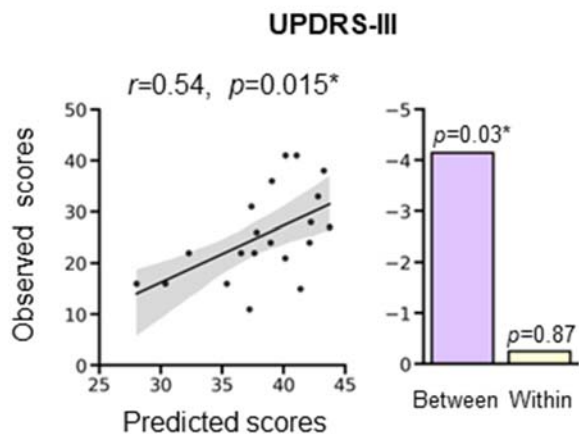

**Supplementary Figure 4 Prediction of UPDRS-III scores in the MRgFUS dataset using the main study model.** There was a significant correlation between predicted and observed UPDRS-III scores ( $R=0.54$ ,  $p=0.007$ ). Between-network markers significantly contributed to UPDRS-III estimation ( $p=0.03$ ), while within-network markers did not ( $p=0.87$ ).

## SUPPLEMENTAL TABLES

### **Supplementary Table 1. MRgFUS study demographic information**

|                                | MRgFUS       |
|--------------------------------|--------------|
| Sample size                    | 10           |
| Sex                            | 2 W / 8 M    |
| Age (SD)                       | 55.40 (6.87) |
| Years of education (SD)        | 10.8 (3.5)   |
| Disease duration in years (SD) | 5.20 (1.66)  |

MRgFUS=MRI-guided focused ultrasound  
SD=standard deviation

### **Supplementary Table 2. UPDRS-III symptom subitems**

| Clinical measures | Scale items                                                            |
|-------------------|------------------------------------------------------------------------|
| Tremor            | UPDRS-III 3.15, 3.16, 3.17                                             |
| Bradykinesia      | UPDRS-III 3.1, 3.2, 3.6, 3.8, 3.9, 3.14                                |
| Rigidity          | UPDRS-III 3.3, 3.4, 3.5, 3.7, 3.12, 3.13                               |
| Gait              | UPDRS-III 3.10, 3.11                                                   |
| Upper extremities | UPDRS-III 3.3 RUE and LUE, 3.4, 3.5, 3.6, 3.15, 3.16, 3.17 RUE and LUE |
| Lower extremities | UPDRS-III 3.3 RLE and LLE, 3.7, 3.8, 3.9, 3.17 RLE and LLE             |

UPDRS-III=Unified Parkinson's Disease Rating Scale-III

**Supplementary Table 3. Demographic information for matched groups**

| K=100 permutations       | PD                | Control      | <i>p</i> (SD) |
|--------------------------|-------------------|--------------|---------------|
| <b>Age-matched</b>       |                   |              |               |
| Sample size              | 51*100            | 51           | -             |
| Age (SD)                 | 58.67 (8.68)      | 55.68 (7.62) | 0.07 (0.02)   |
| Sex                      | 16.87 W / 34.13 M | 32 W / 19 M  | 0.01 (0.02)   |
| Years of education (SD)  | 8.76 (3.52)       | 10.01 (3.71) | 0.13 (0.11)   |
| <b>Sex-matched</b>       |                   |              |               |
| Sample size              | 51*100            | 51           | -             |
| Age (SD)                 | 61.31 (8.10)      | 55.68 (7.62) | 0.00 (0.00)   |
| Sex                      | 22.83 W / 28.17 M | 32 W / 19 M  | 0.11 (0.06)   |
| Years of education (SD)  | 8.53 (3.66)       | 10.01 (3.71) | 0.08 (0.08)   |
| <b>Education-matched</b> |                   |              |               |
| Sample size              | 51*100            | 51           | -             |
| Age (SD)                 | 61.14 (7.96)      | 55.68 (7.62) | 0.00 (0.01)   |
| Sex                      | 18.38 W / 32.62 M | 32 W / 19 M  | 0.03 (0.04)   |
| Years of education (SD)  | 8.87 (3.69)       | 10.01 (3.71) | 0.17 (0.14)   |
| SD=standard deviation    |                   |              |               |

**Supplementary Table 4. Prediction model details**

| Measure      | Prediction model<br><i>R</i> , <i>p</i> (FDR, 0.05) | Between-network<br>model coefficient,<br><i>p</i> (FDR, 0.05) | Within-network<br>model coefficient,<br><i>p</i> (FDR, 0.05) |
|--------------|-----------------------------------------------------|---------------------------------------------------------------|--------------------------------------------------------------|
| <b>Motor</b> |                                                     |                                                               |                                                              |
| UPDRS-III    | 0.21, 0.006**                                       | -4.14, 0.034*                                                 | -0.24, 0.874                                                 |
| Hoehn-Yahr   | 0.22, 0.006**                                       | -0.15, 0.056 <sup>†</sup>                                     | -0.10, 0.190                                                 |
| Tremor       | 0.21, 0.014*                                        | -0.98, 0.036*                                                 | -0.38, 0.984                                                 |
| Bradykinesia | 0.18, 0.032*                                        | -1.17, 0.036*                                                 | 0.04, 0.984                                                  |
| Rigidity     | 0.16, 0.058 <sup>†</sup>                            | -1.71, 0.063 <sup>†</sup>                                     | -0.01, 0.984                                                 |
| Gait         | 0.15, 0.060 <sup>†</sup>                            | -0.27, 0.063 <sup>†</sup>                                     | 0.10, 0.984                                                  |



|                   |               |               |               |
|-------------------|---------------|---------------|---------------|
| Upper extremities | 0.24, 0.007** | -2.14, 0.012* | -0.08, 0.984  |
| Lower extremities | 0.12, 0.120   | -0.85, 0.127  | 0.34, 0.984   |
| Mood              |               |               |               |
| HAMD              | 0.23, 0.006** | -0.50, 0.282  | -1.15, 0.041* |
| HAMA              | 0.21, 0.006** | -0.52, 0.282  | -1.14, 0.041* |

\* $p < 0.05$ ; \*\* $p < 0.01$ ; † $0.05 > p < 0.1$

FDR=False Discovery Rate; HAMA=Hamilton Anxiety Rating Scale; HAMD=Hamilton Depression Rating Scale; UPDRS-III=Unified Parkinson's Disease Rating Scale-III.

**Supplementary Table 5. Mood measure prediction using only within-network FC markers**

| Mood measure | Prediction model<br>$R, p$ | Somatosensory strip<br>model coefficient, $p$ | Insula/auditory cortex<br>model coefficient, $p$ |
|--------------|----------------------------|-----------------------------------------------|--------------------------------------------------|
| HAMD         | 0.22, 0.004**              | -0.49, 0.353                                  | -0.93, 0.082                                     |
| HAMA         | 0.21, 0.004**              | -0.09, 0.863                                  | -1.30, 0.023*                                    |

\* $p < 0.05$ ; \*\* $p < 0.01$

HAMA=Hamilton Anxiety Rating Scale; HAMD=Hamilton Depression Rating Scale; UPDRS-III=Unified Parkinson's Disease Rating Scale-III.
